# Supplementary material
Source: PubMed Central journal article supplement (PMC7089807)

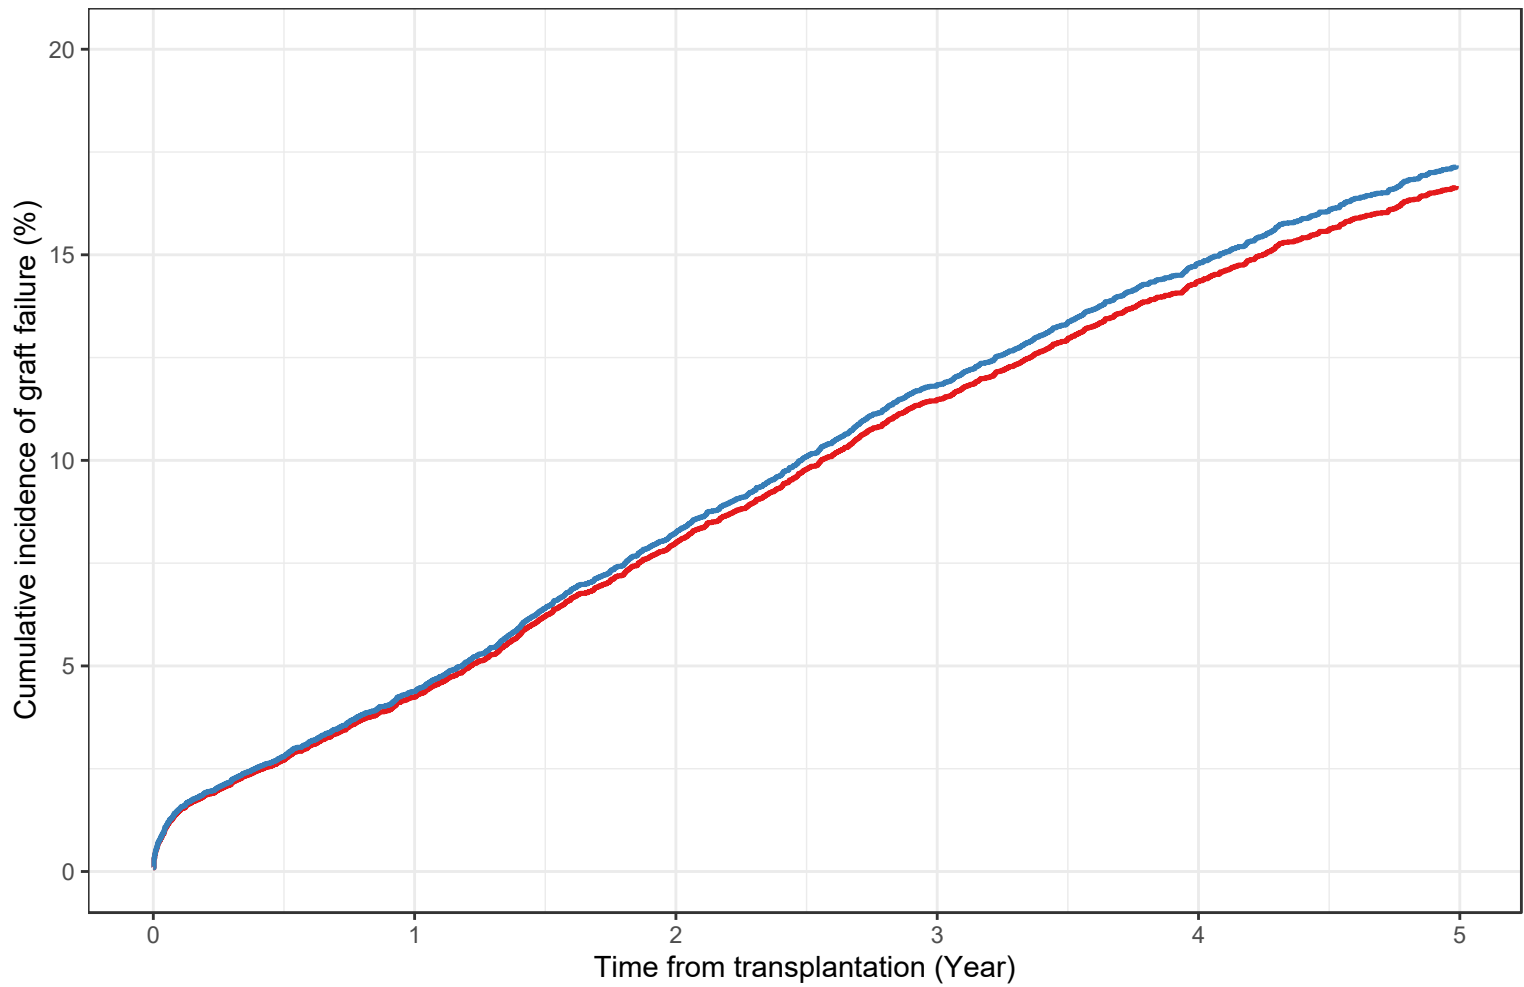

— Organs accepted by first-rank patients    — Organs accepted by lower-rank patients

Supplement: NIHMS1556254-supplement-1.pdf [file NIHMS1556254-supplement-1.pdf]

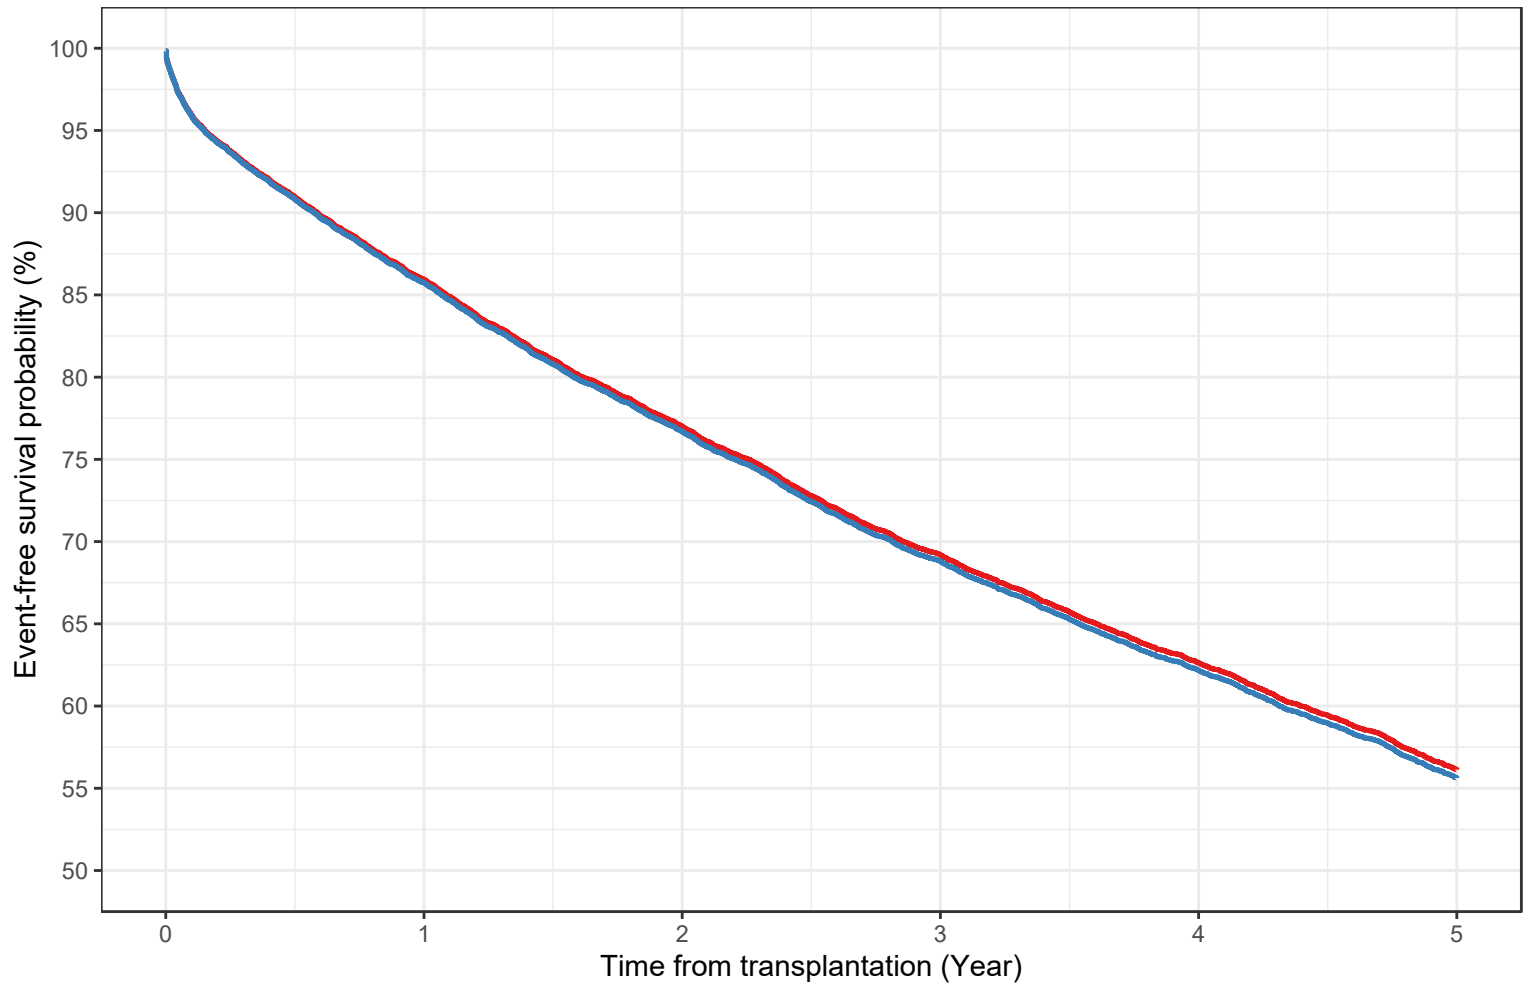

— Organs accepted by first-rank patients    — Organs accepted by lower-rank patients

Supplement: NIHMS1556254-supplement-2.pdf [file NIHMS1556254-supplement-2.pdf]
